# Supplementary material for: Ultrastable Li-ion battery anodes by encapsulating SnS nanoparticles in sulfur-doped graphene bubble films
Source: Royal Society of Chemistry journal article supplement (doi:10.1039/c9nr10608a), 2020-01-01
Supplement: c9nr10608a1.pdf [file c9nr10608a1.pdf]

*Supporting Information*

**Ultrastable Li-ion battery anode by encapsulating SnS nanoparticles  
in sulfur-doping graphene bubble film**

Bing Zhao <sup>a,b</sup>, Daiyun Song <sup>a</sup>, Yanwei Ding <sup>a</sup>, Juan Wu <sup>a</sup>, Zhixuan Wang <sup>a,b</sup>, Zhiwen  
Chen <sup>a</sup>, Yong Jiang <sup>a,b\*</sup>, Jiujuun Zhang<sup>b,\*</sup>

<sup>a</sup> *School of Environmental and Chemical Engineering, Shanghai University, Shanghai  
200444, China.*

<sup>b</sup> *Institute for Sustainable Energy/College of Science, Shanghai University, Shanghai  
200444, China.*

\* Corresponding author.

*E-mail address:* jiangyong@shu.edu.cn (Y. Jiang), jiujuun.zhang@i.shu.edu.cn (J.  
Zhang)

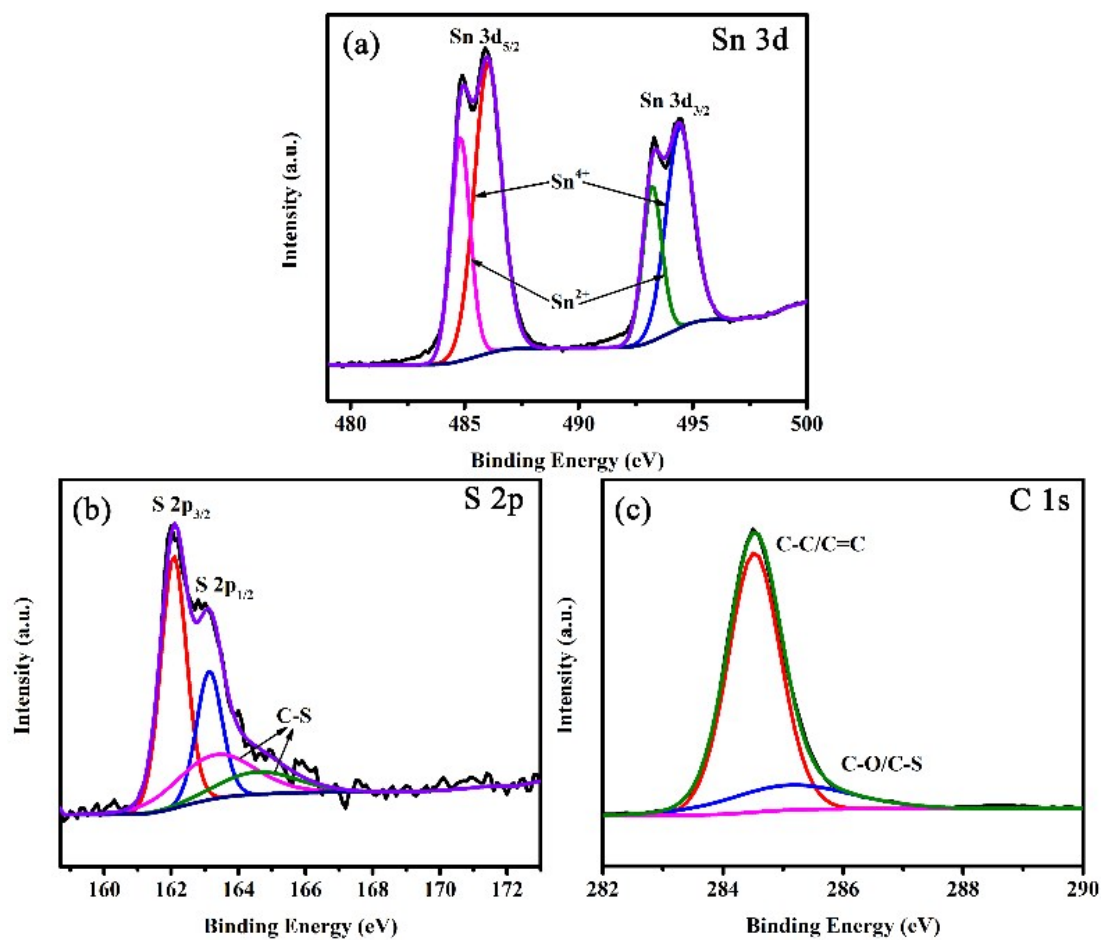

**Figure S1.** High-resolution (a) Sn 3d, (b) S 2p, and (c) C 1s XPS spectra of SnS/G.

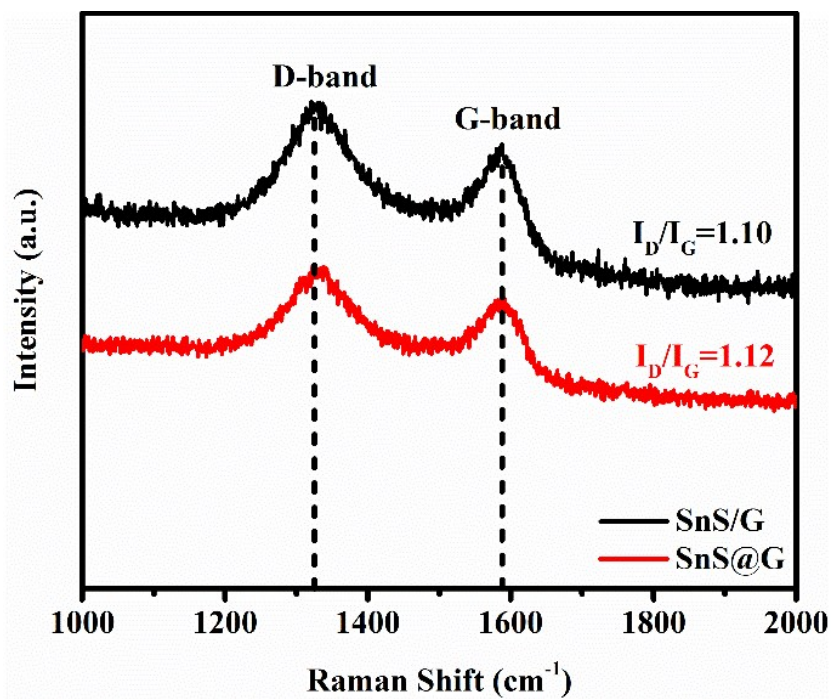

**Figure S2.** Raman spectra of SnS/G and SnS@G composites.

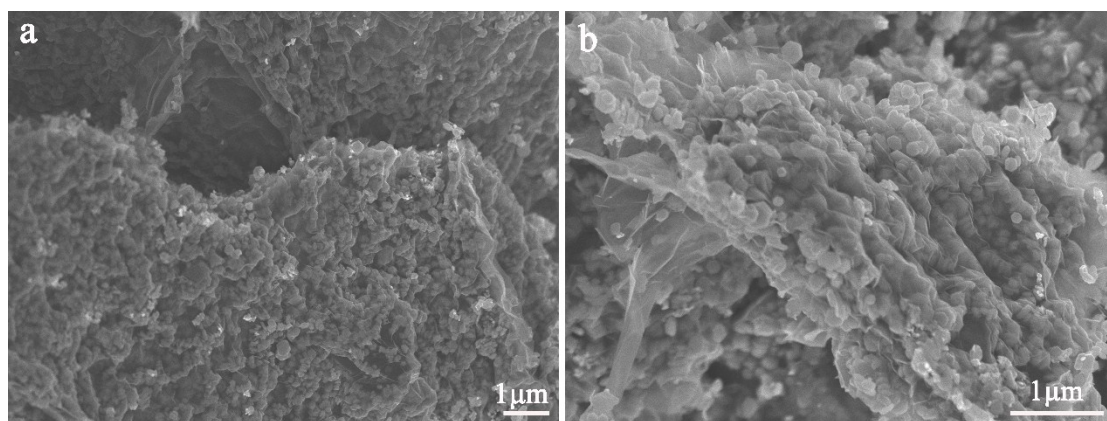

**Figure S3.** SEM images of SnS@G.

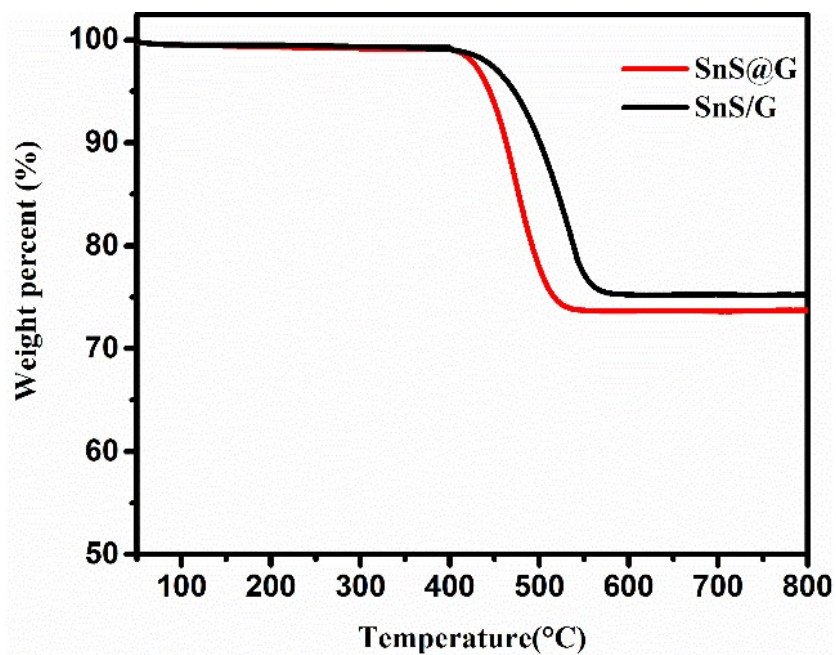

Figure S4. TG curves of SnS/G and SnS@G.

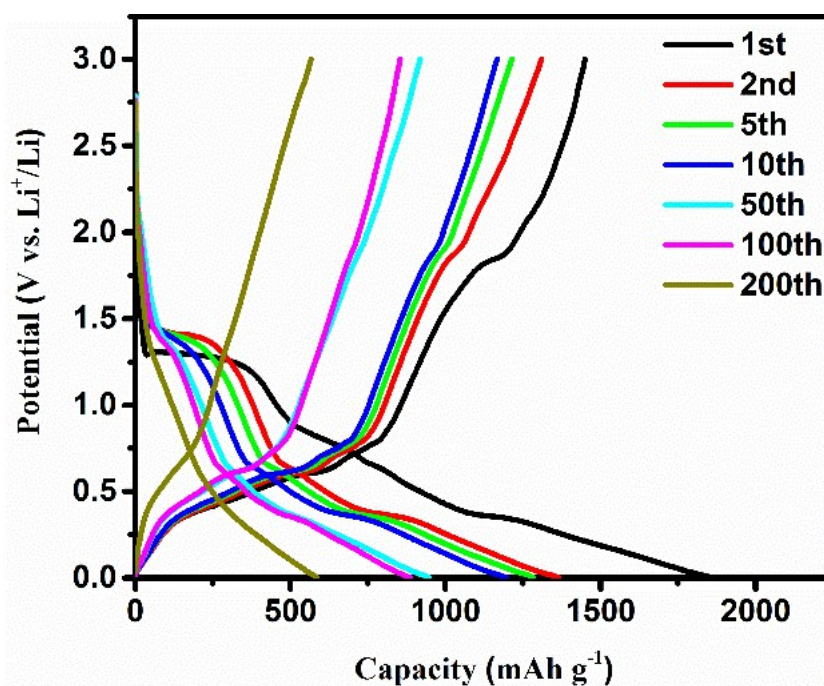

Figure S5. Typical discharge/charge curves of SnS/G at a current density of  $0.1 \text{ A g}^{-1}$ .

**Table S1.** Comparison of Li storage performances of SnS@G in this work with those of others reported in the literatures.

| Samples                                                          | Initial Coulombic efficiency (%) | Capacity retention after long cycles (mAh g <sup>-1</sup> ) |                                        |                                          | Ref.      |
|------------------------------------------------------------------|----------------------------------|-------------------------------------------------------------|----------------------------------------|------------------------------------------|-----------|
|                                                                  |                                  | cycles                                                      | current densities (A g <sup>-1</sup> ) | Reversed capacity (mAh g <sup>-1</sup> ) |           |
| SnS@G                                                            | 83.2                             | 200                                                         | 0.1 A g <sup>-1</sup>                  | 1462 mAh g <sup>-1</sup>                 | This work |
| SnS/Polypyrrole                                                  | 59.4                             | 50                                                          | 0.1 A g <sup>-1</sup>                  | 1000mAh g <sup>-1</sup>                  | [S1]      |
| SnS/S-GNS                                                        | 81.7                             | 100                                                         | 0.1 A g <sup>-1</sup>                  | 893.9 mAh g <sup>-1</sup>                | [S2]      |
| SnS/C NFs                                                        | 70.3                             | 500                                                         | 0.2 A g <sup>-1</sup>                  | 648 mAh g <sup>-1</sup>                  | [S3]      |
| SnS/C nanospheres                                                | 80.2                             | 50                                                          | 0.1 A g <sup>-1</sup>                  | 936 mAh g <sup>-1</sup>                  | [S4]      |
| Se-doped SnS carbon nanofibers                                   | 72                               | 100                                                         | 0.1 A g <sup>-1</sup>                  | 693 mAh g <sup>-1</sup>                  | [S5]      |
| SnS nanoparticles/PDDA-Ti <sub>3</sub> C <sub>2</sub> nanosheets | 82                               | 100                                                         | 0.1 A g <sup>-1</sup>                  | 646 mAh g <sup>-1</sup>                  | [S6]      |
| Three-Dimensional SnS @C                                         | 55                               | 100                                                         | 0.1 A g <sup>-1</sup>                  | 780 mAh g <sup>-1</sup>                  | [S7]      |
| C@SnS/SnO <sub>2</sub> @CNFs                                     | 42                               | 200                                                         | 0.5 A g <sup>-1</sup>                  | 696 mAh g <sup>-1</sup>                  | [S8]      |

**Table S2** Kinetic parameters of SnS/G and SnS@G electrodes.

| Sample       | $R_e$<br>( $\Omega$ ) | $R_f$<br>$\Omega()$ | $R_{ct}$<br>( $\Omega$ ) | $\Delta R_{ct}$<br>( $\Omega$ ) | $\sigma_w$<br>( $\Omega \text{ s}^{-0.5}$ ) | $D_{Li^+}$<br>( $\text{cm}^2 \text{ s}^{-1}$ ) |
|--------------|-----------------------|---------------------|--------------------------|---------------------------------|---------------------------------------------|------------------------------------------------|
| <b>SnS@G</b> | Before cycle          | 2.18                | -                        | 52.69                           | 24.73                                       | $1.49 \times 10^{-13}$                         |
|              | After 1st cycle       | 2.48                | 17.52                    | 27.96                           |                                             |                                                |
| <b>SnS/G</b> | Before cycle          | 2.08                | -                        | 61.72                           | 12.36                                       | $2.89 \times 10^{-14}$                         |
|              | After 1st cycle       | 2.57                | 22.12                    | 49.36                           |                                             |                                                |

The true diffusion coefficient of lithium ion ( $D_{Li^+}$ ) can be calculated from the sloping lines as the following equation.

$$D_{Li^+} = R^2 T^2 / 2 A^2 n^4 F^4 C^2 \sigma_w^2 \quad (1)$$

where  $R$  is the gas constant,  $T$  is the absolute temperature,  $A$  is the contact area between the composite anode and electrolyte (for simplicity, area of the electrode is used here),  $n$  is the charge-transfer number,  $C$  is the molar concentration of lithium ions in the active material,  $F$  represents the Faraday constant, and Warburg coefficient ( $\sigma_w$ ) is determined by  $Z_{re}$  and  $\omega^{-1/2}$  ( $\omega$  is the angular frequency). The linear relationship between  $Z_{re}$  and  $\omega^{-1/2}$  in the low frequency region is shown in Figure 4g, and the data graph is fitted to the Warburg factor  $\sigma_w$ , and then the  $Li^+$  diffusion coefficient ( $D_{Li^+}$ ) is calculated from equation (1). The results show that the  $D_{Li^+}$  of SnS@G is calculated to be  $1.49 \times 10^{-13}$  and 5 times to the SnS/G electrode (Table S1), indicating that rapid lithium ion transport kinetics is obtained for thin SEI layer in the graphene bubble film encapsulated SnS composite.

## References

- S1. J. Liu, M. Gu, L. Ouyang, H. Wang, L. Yang and M. Zhu, *ACS Appl. Mater. Inter.*, 2016, **8**, 8502-8510.
- S2. Y. Jiang, Y. Ding, F. Chen, Z. Wang, Y. Xu, S. Huang, Z. Chen, B. Zhao and J. Zhang, *Nanoscale*, 2020.
- S3. J. Xia, L. Liu, S. Jamil, J. Xie, H. Yan, Y. Yuan, Y. Zhang, S. Nie, J. Pan and X. Wang, *Energy Storage Materials*, 2019, **17**, 1-11.
- S4. Z. Deng, H. Jiang, Y. Hu, C. Li, Y. Liu and H. Liu, *AIChE Journal*, 2018, **64**, 1965-1974.
- S5. L. Lu, L. Zhang, H. Zeng, B. Xu, L. Wang and Y. Li, *J. Alloy. Compd.*, 2017, **695**, 1294-1300.
- S6. J. Ai, Y. Lei, S. Yang, C. Lai and Q. Xu, *Chem. Eng.J. l*, 2019, **357**, 150-158.
- S7. Y. Zhou, Q. Wang, X. Zhu and F. Jiang, *Nanomaterials*, 2018, **8**, 135.
- S8. J. Zheng, Y. Luo, D. Xie, X. Xiong, Z. Lin, G. Wang, C. Yang and M. Liu, *J. Alloy. Compd.*, 2019, **779**, 67-73.
